# Supplementary material for: Stable blue TiO2−x nanoparticles for efficient visible light photocatalysts
Source: Royal Society of Chemistry journal article supplement (doi:10.1039/c3ta14484d), 2014-01-01

## SUPPORTING INFORMATION

### Stable Blue $\text{TiO}_{2-x}$ Nanoparticles for Efficient Visible Light Photocatalyst

Qing Zhu, Yin Peng, Ling Lin, Cong-Min Fan, Gui-Qi Gao, Rui-Xia Wang, An-Wu Xu\*

Division of Nanomaterials and Chemistry, Hefei National Laboratory for Physical Sciences at  
Microscale, Department of Chemistry, University of Science and Technology of China, Hefei  
230026, P. R. China.

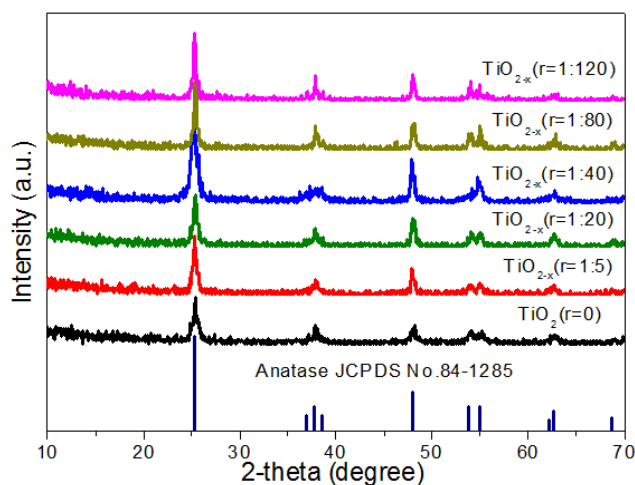

**Figure S1.** Evolution of XRD patterns prepared at different molar ratio of  $\text{Ti}^{4+}/\text{Ti}^{3+}$  under the same conditions. The change of the value ranging from 0 to 1:120 has little effect on the crystal phase of  $\text{Ti}^{3+}$  self-doped  $\text{TiO}_{2-x}$ . All samples were crystallized into anatase phase by solvothermal treatment. Standard PDF card of anatase  $\text{TiO}_2$  was given as reference.

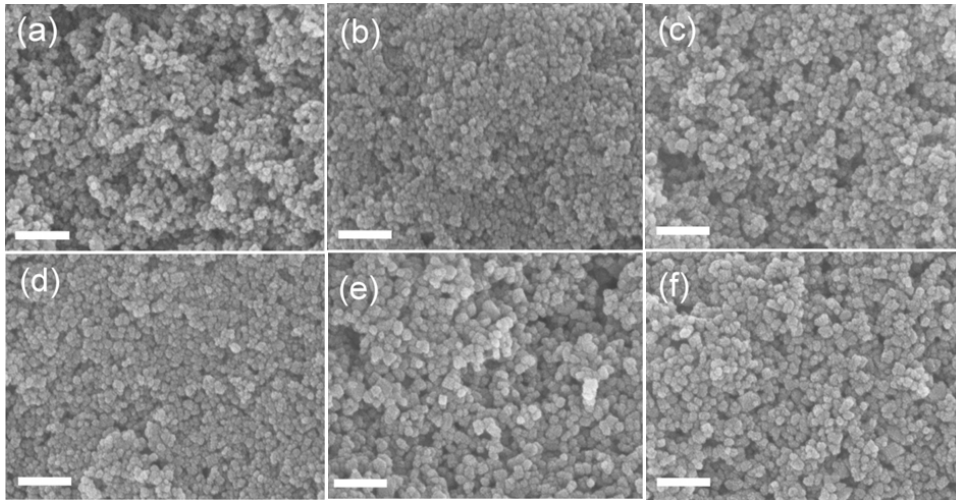

**Figure S2.** SEM images of self-doped  $\text{TiO}_{2-x}$  samples obtained with different ratios of  $\text{TiCl}_3$  and  $\text{TiF}_4$  reactants: (a)  $r = 0$ , (b)  $r = 1:5$ , (c)  $r = 1:20$ , (d)  $r = 1:40$ , (e)  $r = 1:80$ , (f)  $r = 1:120$ . The scale bars are 200 nm.

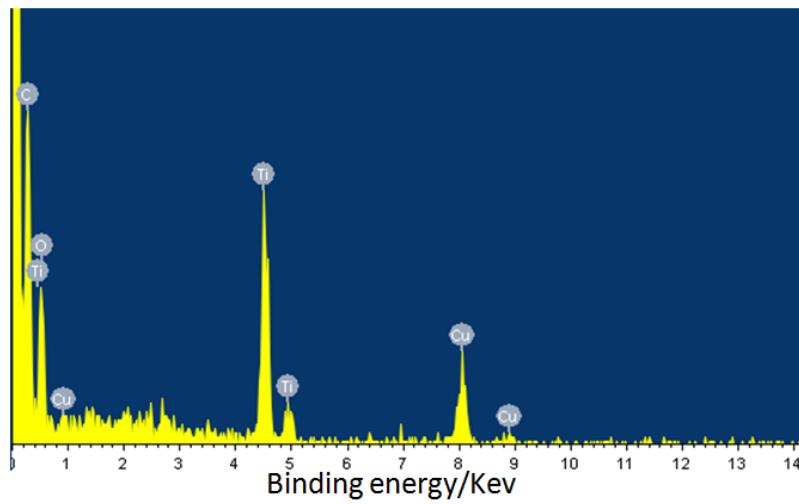

**Figure S3.** EDS spectrum of the obtained  $\text{Ti}^{3+}$  self-doped  $\text{TiO}_{2-x}$  ( $r = 1:40$ ) sample.

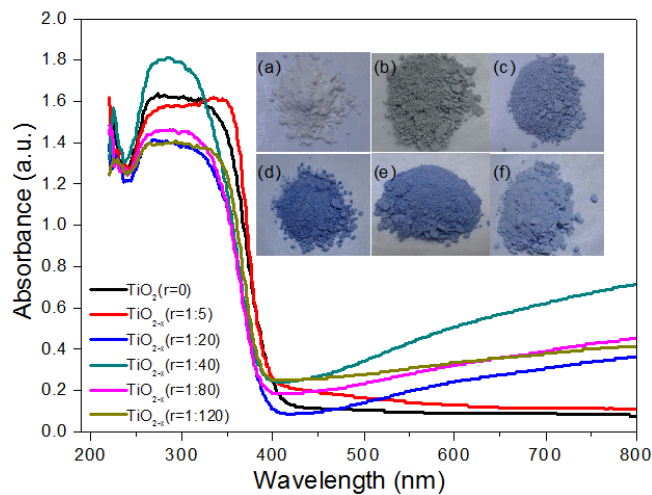

**Figure S4.** The UV–visible absorption spectra of samples prepared using different ratios of  $\text{TiCl}_3$  and  $\text{TiF}_4$ . The inset is the photographs of corresponding samples by using (a)  $r = 0$ , (b)  $r = 1:5$ , (c)  $r = 1:20$ , (d)  $r = 1:40$ , (e)  $r = 1:80$ , (f)  $r = 1:120$ .

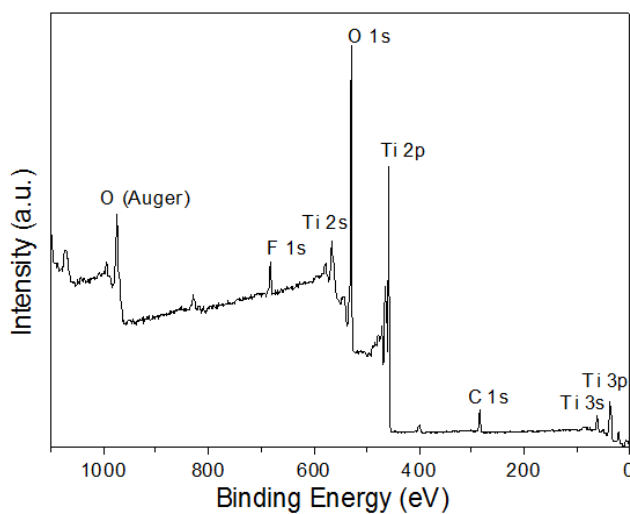

**Figure S5.** The survey XPS spectrum of  $\text{Ti}^{3+}$  self-doped  $\text{TiO}_{2-x}$  sample ( $r = 1:40$ ).

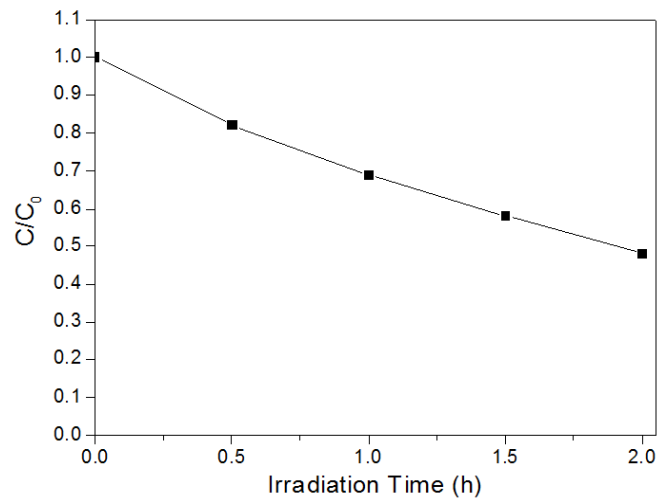

**Figure S6.** Photodecomposition of MB with TiO<sub>2</sub> synthesized using TiF<sub>4</sub> as a second reference under visible light irradiation ( $\lambda \geq 400$  nm).

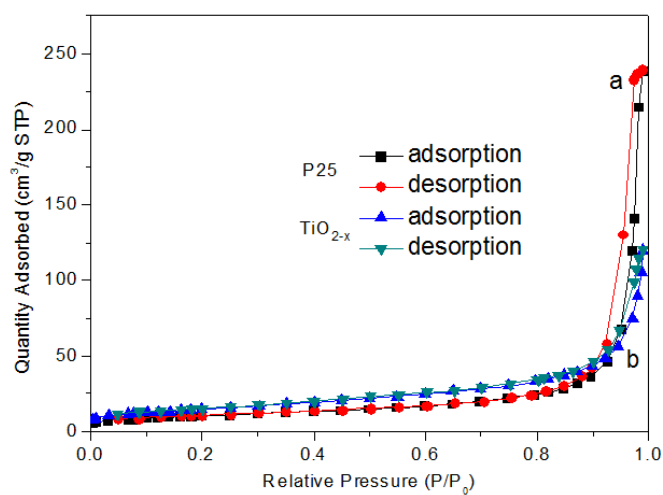

**Figure S7.** Nitrogen adsorption-desorption isotherms of (a) commercial Degussa P25 and (b) Ti<sup>3+</sup> self-doped TiO<sub>2</sub> nanocrystals.

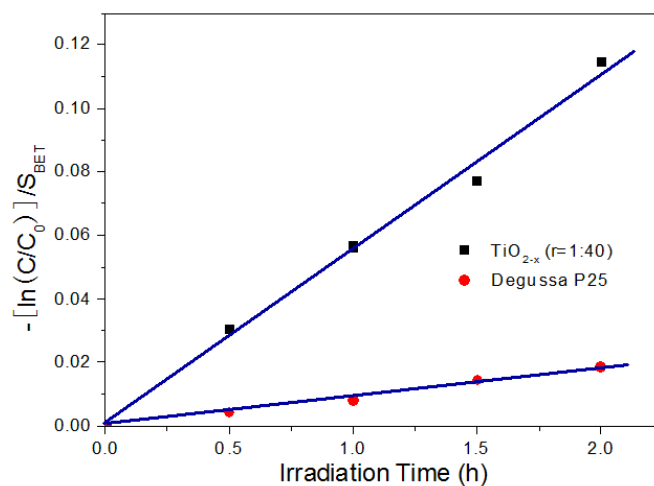

**Figure S8.** The Plot of  $-\ln(C/C_0)/S_{\text{BET}}$  vs. time curves of photodegradation of MB with respect to irradiation time. The apparent rate constant  $k'_{\text{MB}}$  of MB photodegradation for  $\text{Ti}^{3+}$  self-doped  $\text{TiO}_{2-x}$  ( $0.114 \text{ h}^{-1} \text{ m}^{-2} \text{ g}$ ) is more than 6.2 times higher than that for Degussa P25  $\text{TiO}_2$  ( $0.0184 \text{ h}^{-1} \text{ m}^{-2} \text{ g}$ ).

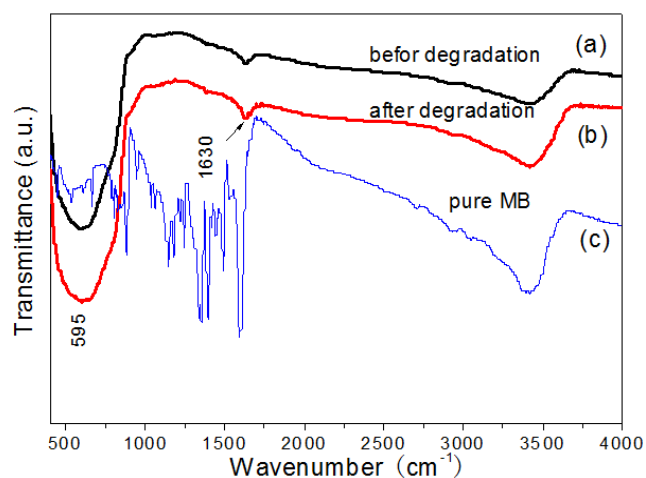

**Figure S9.** FTIR spectra of (a) the as-synthesized  $\text{Ti}^{3+}$  self-doped  $\text{TiO}_{2-x}$ , (b) recovered sample after photocatalytic reaction, and (c) pure methylene blue.

**S10.** The relevant reactions occurring on the blue titania surface and transfer of photogenerated carriers involved in the MB degradation process under visible-light irradiation.

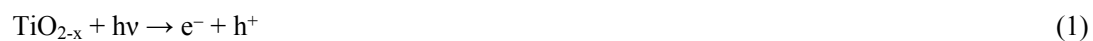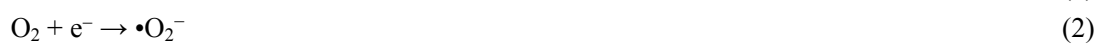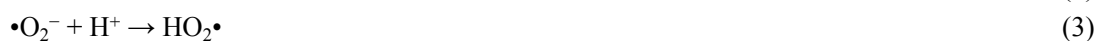

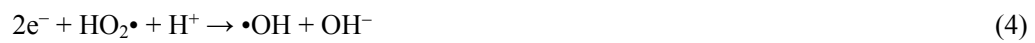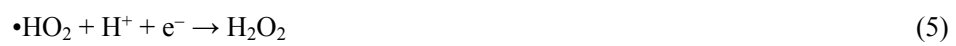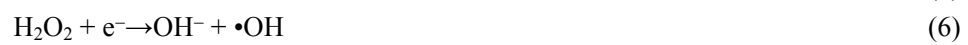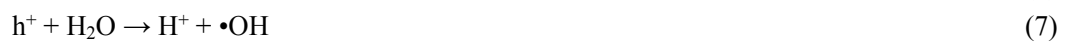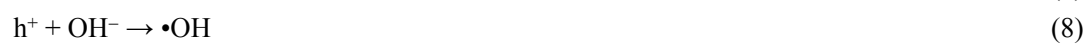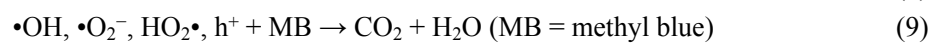

Supplement: c3ta14484d1.pdf [file c3ta14484d1.pdf]
